# Supplementary material
Source: PubMed Central journal article supplement (PMC5710341)
Supplement: jama-317-2187-s001.pdf [file jama-317-2187-s001.pdf]

## Supplementary Online Content

Detsky ME, Harhay MO, Bayard DF, et al. Discriminative accuracy of physician and nurse predictions for survival and functional outcomes 6 months after an ICU admission. *JAMA*. doi:10.1001/jama.2017.4078

**eAppendix 1.** Exclusion Criteria

**eTable 1.** Outcomes Predicted by Physicians and Nurses

**eAppendix 2.** Survey for Prognosis Questions for ICU Physicians

**eTable 2.** Mock 2x2 Table With Definitions

**eFigure 1.** Flow Diagram for Study Cohort

**eTable 3.** 2x2 Tables for Comparing Physician Predictions to Outcomes for All Predictions

**eTable 4.** Operating Characteristics of Physicians for All Predictions

**eTable 5.** 2x2 Tables for Comparing Nurse Predictions to Outcomes for All Predictions

**eTable 6.** Operating Characteristics of Nurses for All Predictions

**eTable 7.** Agreement Between Physicians and Nurses Evaluating the Same Patient

**eTable 8.** 2x2 Tables of Physician and Nurse Predictions of Outcomes

**eTable 9.** 2x2 Tables for Comparing Physician Predictions to Outcomes for Confident Predictions

**eFigure 2.** Likelihood Ratios for Physicians and Nurses, Total Population and Confident Predictions

**eTable 10.** Operating Characteristics by Physicians When Restricted to Confident Predictions

**eTable 11.** 2x2 Tables for Comparing Nurses Predictions to Outcomes for Confident Predictions

**eTable 12.** Operating Characteristics of Nurses When Restricted to Confident Predictions

**eFigure 3.** Likelihood Ratios for Physicians and Nurses Concordant Predictions

**eTable 13.** Operating Characteristics of Concordant Responses and at Both Providers Being Confident at Predicting Mortality and 6 Month Physical and Cognitive Function

**eFigure 4.** Physician and Nurse Predictions of 6-Month Mortality by APACHE III Quartile

**eTable 14.** Prediction of Outcomes Based on Objective Measures, Physician, Nurse Predictions and Confidence

This supplementary material has been provided by the authors to give readers additional information about their work.

## **eAppendix 1. Exclusion Criteria**

Patients less than 18 years of age,

Patients for whom we could not obtain consent (e.g., unavailable surrogate, physician refusal)

Patients for whom we could not conduct long-term follow up (inability to speak English, home address unavailable),

Immediate plan to move to palliation or hospice,

Incarcerated individuals.

Prior enrollment in the study on earlier ICU admission

Neurosurgical and trauma patients

**eTable 1.** Outcomes Predicted by Physicians and Nurses

| Outcome                               | Justification                                                                                                                                                                                                                                                                                                                                         | Collection of Data                                            |
|---------------------------------------|-------------------------------------------------------------------------------------------------------------------------------------------------------------------------------------------------------------------------------------------------------------------------------------------------------------------------------------------------------|---------------------------------------------------------------|
| Hospital mortality                    | This outcome has been used extensively in critical care studies and is universally accepted as an outcome of interest.                                                                                                                                                                                                                                | From discharge summary at 6 months                            |
| 6 month mortality                     | This outcome has been used extensively in critical care studies and is universally accepted as an outcome of interest.                                                                                                                                                                                                                                | From surrogate in 6 month follow up                           |
| Return to original place of residence | This has been used as an outcome in multiple ICU outcome studies and is considered a global surrogate for overall function. <sup>1,2</sup> We have selected 6 months based on the intensive care medicine roundtable discussion as a point at which outcomes at least need to be assessed. <sup>3</sup>                                               | From surrogate/patient in 6 month follow up                   |
| Toileting                             | This is a complex activity of daily living that involves physical and cognitive faculties to be intact. It is easily definable and measurable <sup>5</sup> and is of value to patients and surrogates to understand what life would be like if they are unable to accomplish this goal.                                                               | From patient or surrogate at enrollment and 6 month follow up |
| Ambulation                            | The ability to ambulate is important for maintaining independence. The definition we used is based on a recent review on mobility in the elderly that included this question in the assessment of self reporting difficulty with ambulation. <sup>6</sup> This definition is easy to define and able to be answered by either patients or surrogates. | From patient or surrogate at enrollment and 6 month follow up |
| Cognition                             | This is a prevalent disability following critical illness and is becoming more recognized as a potential outcome to follow, <sup>7</sup> though is challenging to predict based on existing screening methods. <sup>8</sup> The definition we used is based on the cognitive questioning in the Health Utilities Index score. <sup>9</sup>            | From patient or surrogate at enrollment and 6 month follow up |

References

1. Conti M, Friolet R, Eckert P et al. Home return 6 months after an intensive care unit admission for elderly patients. *Acta Anaesthesiologica Scandinavica*. 2011; vol 55(4) pp. 387-393.
2. Mahul P, Perrot D, Tempelhoff G, Gaussorgues P, Jospe R, Ducreux JC, et al. Short- and long-term prognosis, functional outcome following ICU for elderly. *Intensive Care Med*. 1991;17(1):7-10.
3. Angus DC, Carlet J et al. Surviving Intensive Care: a report from the 2002 Brussels Roundtable. *Intensive Care Medicine* (2003). 29:368-377.
4. Herridge MS, Cheung AM, Tansey CM et al. One-year outcomes in survivors of the Acute Respiratory Distress Syndrome. *N Engl J Med* 2003; 348:683-693.
5. Katz S, Downs TD, Cash HR et al. Progress in development of the index of ADL. *Gerontologist*. 1970 Spring; 10(1): 20-30.
6. Brown CJ, Flood KL. Mobility limitation in the older patient: a clinical review. *JAMA* 2013;310(11):1168-1177.
7. Horsman J, Furlong W, Feeny D, Torrance G. The health utilities index (HUI): concepts, measurement properties and applications. *Health Qual Life Outcomes*. 2003. Oct 16; 1:54.
8. Pandharipande PP, Girard TD, Jackson JC et al. Long-term cognitive impairment after critical illness. *NEJM*. 2013 Oct 3; 369(14): 1306-16.
9. Horsman J, Furlong W, Feeny D, et al. The health utilities index (HUI): concepts, measurement properties and applications. *Health Qual Life Outcomes*. 2003;1:54.

**eAppendix 2.** Survey for Prognosis Questions for ICU Physicians

1. Do you think the patient will survive their hospitalization?

Yes

No

How confident are you in that answer?

1 Not confident at all

2 Slightly confident

3 Moderately confident

4 Considerably confident

5 Very confident

2. Do you think the patient will be alive in six months?

Yes

No

How confident are you in that answer?

1 Not confident at all

2 Slightly confident

3 Moderately confident

4 Considerably confident

5 Very confident

3. 6 months from now, will the patient be living in their original place of residence (prior to their critical illness)?

Yes

No

How confident are you in that answer?

1 Not confident at all

2 Slightly confident

3 Moderately confident

4 Considerably confident

5 Very confident

4. If the patient is still alive in 6 months, is the patient going to be able to walk up 10 consecutive stairs unassisted by another person?

Yes

No

How confident are you in that answer?

1 Not confident at all

2 Slightly confident

3 Moderately confident

4 Considerably confident

5 Very confident

5. If the patient is still alive in 6 months, is the patient going to be able to use the toilet independently? (Being able to toilet would be defined as; goes to "toilet room," cleans self, and

arranges clothes without assistance (may use object for support such as cane, walker, or wheelchair and may manage night bedpan or com-mode, emptying same in morning))

Yes

No

How confident are you in that answer?

1 Not confident at all

2 Slightly confident

3 Moderately confident

4 Considerably confident

5 Very confident

6. If the patient is still alive in 6 months, is the patient going to be able to do all of the following; "remember most things, think clearly and solve day to day problems?"

Yes

No

How confident are you in that answer?

1 Not confident at all

2 Slightly confident

3 Moderately confident

4 Considerably confident

5 Very confident

**eTable 2.** Mock 2x2 Table With Definitions

|                           | Adverse outcome at follow up         | Favorable outcome at follow up        |                                     |
|---------------------------|--------------------------------------|---------------------------------------|-------------------------------------|
| Predict adverse outcome   | A True adverse outcome prediction    | B False adverse outcome prediction    | Total adverse outcome predictions   |
| Predict favorable outcome | C False favorable outcome prediction | D True favorable outcome prediction   | Total favorable outcome predictions |
| Total                     | Total adverse outcomes at follow up  | Total favorable outcomes at follow up | Total population (TP)               |

Sensitivity= $A/A+C$

Specificity= $D/B+D$

Likelihood ratio positive (LR+) =  $(A/A+C)/(B/B+D)$  = sensitivity/1-specificity

Likelihood ratio negative (LR-) =  $(C/A+C)/(D/B+D)$  = 1-sensitivity/specificity

Diagnostic odds ratio=Likelihood ratio positive/likelihood ratio negative

Positive predictive value= $A/A+B$

Negative predictive value= $D/C+D$

“Positive test” defined as a predicted adverse outcome and a “negative test” as a predicted favorable outcome.

“Disease positive” is defined as the adverse outcome (e.g., death, not able to toilet independently, etc.) and “disease negative” is defined as the favorable outcome (e.g., alive, able to toilet independently, etc.).

Note: In this study’s context, the LR+ represents the ratio of the probability of having an adverse outcome when patients are predicted to have an adverse outcome (i.e., sensitivity), divided by the probability of having a favourable outcome when patients are predicted to have an adverse outcome (i.e., 1 minus specificity). The LR- represents the ratio of the probability of having an adverse outcome when patients are predicted to fare favourably (i.e. 1 minus sensitivity) divided by the probability of having a favourable outcome when patients are predicted to fare favourably (i.e., specificity).

**eFigure 1.** Flow Diagram for Study Cohort

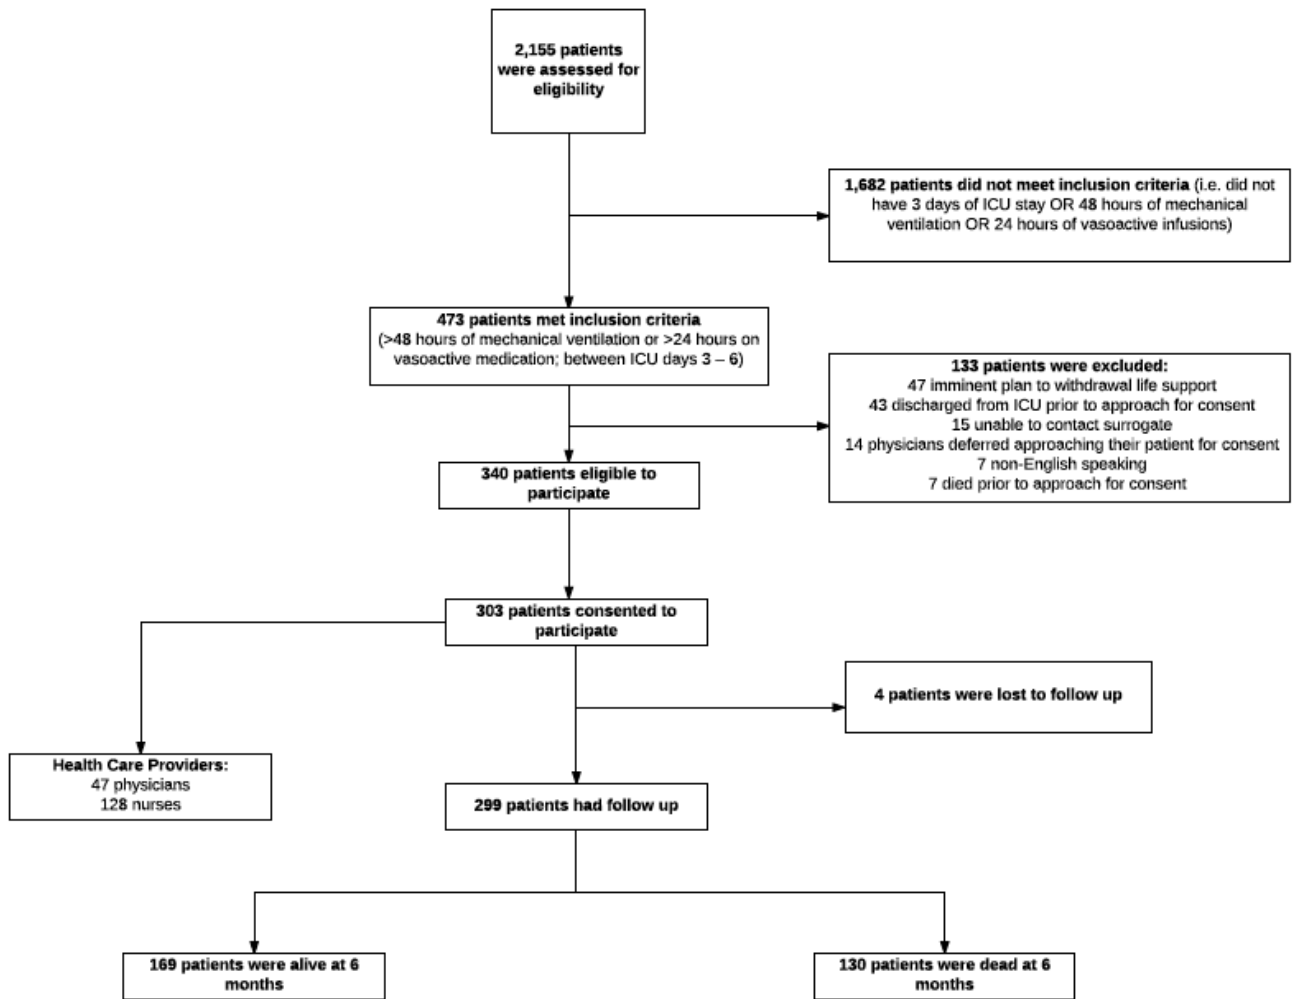

**eTable 3.** 2x2 Tables for Comparing Physician Predictions to Outcomes for All Predictions

|                       |                                             |                    |                   |       |
|-----------------------|---------------------------------------------|--------------------|-------------------|-------|
|                       | Hospital mortality                          |                    |                   | Total |
|                       |                                             | Died in hospital   | Survived hospital |       |
| Physician predictions | Death                                       | 29                 | 20                | 49    |
|                       | Survival                                    | 40                 | 209               | 249   |
|                       |                                             | 69                 | 229               | 298   |
|                       | 6 month mortality                           |                    |                   |       |
|                       |                                             | Died by 6 months   | Alive at 6 months |       |
| Physician predictions | Death                                       | 81                 | 18                | 99    |
|                       | Survival                                    | 47                 | 150               | 197   |
|                       |                                             | 128                | 168               | 296   |
|                       | Inability to return home at 6 months        |                    |                   |       |
|                       |                                             | Not home           | Home              |       |
| Physician predictions | Not home                                    | 94                 | 26                | 120   |
|                       | Home                                        | 62                 | 112               | 174   |
|                       |                                             | 156                | 138               | 294   |
|                       | Inability to toilet at 6 months             |                    |                   |       |
|                       |                                             | Not toileting      | Toileting         |       |
| Physician predictions | Not toileting                               | 16                 | 12                | 28    |
|                       | Toileting                                   | 14                 | 123               | 137   |
|                       |                                             | 30                 | 135               | 165   |
|                       | Inability to ambulate 10 stairs at 6 months |                    |                   |       |
|                       |                                             | Not ambulating     | Ambulating        |       |
| Physician predictions | Not ambulating                              | 30                 | 34                | 64    |
|                       | Ambulating                                  | 17                 | 82                | 99    |
|                       |                                             | 47                 | 116               | 163   |
|                       | Abnormal cognition at 6 months              |                    |                   |       |
|                       |                                             | Abnormal cognition | Normal cognition  |       |
| Physician predictions | Abnormal cognition                          | 23                 | 16                | 39    |
|                       | Normal cognition                            | 39                 | 86                | 125   |
|                       |                                             | 62                 | 102               | 164   |

n=number of patients



**eTable 4. Operating Characteristics of Physicians for All Predictions<sup>a</sup>**

|                                                               | Prevalence <sup>b</sup><br>(No.; %<br>(95% CI)) | Sensitivity <sup>b</sup> | Specificity <sup>b</sup> | Likelihood<br>ratio positive <sup>c</sup> | Likelihood<br>ratio<br>negative <sup>c</sup> | Diagnostic<br>odds ratio <sup>c</sup> | Positive<br>predictive<br>value <sup>b</sup> | Negative<br>predictive<br>value <sup>b</sup> |
|---------------------------------------------------------------|-------------------------------------------------|--------------------------|--------------------------|-------------------------------------------|----------------------------------------------|---------------------------------------|----------------------------------------------|----------------------------------------------|
| Hospital mortality (n=298)                                    | n=69<br>23.2<br>(18.0-28.4)                     | 42.0<br>(30.2-54.5)      | 91.3<br>(86.8-94.6)      | 4.81<br>(2.91- 7.95)                      | 0.64<br>(0.52-0.78)                          | 7.58<br>(3.93-14.6)                   | 59.2<br>(44.2-73.0)                          | 83.9<br>(78.8-88.3)                          |
| 6 month mortality (n=296)                                     | n=128<br>43.2<br>(37.5-49.1)                    | 63.3<br>(54.3-71.6)      | 89.3<br>(83.6-93.5)      | 5.91<br>(3.74-9.32)                       | 0.41<br>(0.33- 0.52)                         | 14.36<br>(7.86-26.23)                 | 81.8<br>(72.8-88.9)                          | 76.1<br>(69.6-81.9)                          |
| Inability to return to original residence at 6 months (n=294) | n=156<br>53.1<br>(47.2-58.9)                    | 60.3<br>(52.1-68.0)      | 81.1<br>(73.6-87.3)      | 3.20<br>(2.21- 4.62)                      | 0.49<br>(0.40- 0.60)                         | 6.53<br>(3.84-11.11)                  | 78.3<br>(69.9-85.3)                          | 64.4<br>(56.8- 71.5)                         |
| Unable to toilet independently at 6 months (n=165)            | n=30<br>18.2<br>(12.6-24.9)                     | 53.3<br>(34.3-71.7)      | 91.1<br>(85.0-95.3)      | 6.00<br>(3.18-11.30)                      | 0.51<br>(0.35-0.75)                          | 11.71<br>(4.68- 29.40)                | 57.1<br>(37.2-75.5)                          | 89.8<br>(83.4-94.3)                          |
| Unable to ambulate 10 stairs at 6 months (n=163)              | n=47<br>28.8<br>(22.0-36.4)                     | 63.8<br>(48.5-77.3)      | 70.7<br>(61.5-78.8)      | 2.18<br>(1.53-3.11)                       | 0.51<br>(0.34-0.76)                          | 4.26<br>(2.09-8.67)                   | 46.9<br>(34.3-59.8)                          | 82.8<br>(73.9-89.7)                          |
| Abnormal cognition at 6 months (n=164)                        | n=62<br>37.8<br>(30.4-45.7)                     | 37.1 (25.2-50.3)         | 84.3<br>(75.8-90.8)      | 2.36<br>(1.36-4.12)                       | 0.75<br>(0.61-0.92)                          | 3.17<br>(1.52- 6.61)                  | 59.0<br>(42.1-74.4)                          | 68.8<br>(59.9-76.8)                          |

<sup>a</sup>( ) represents 95% confidence intervals

<sup>b</sup> presented as percentage

<sup>c</sup> presented as a ratio

n=number of patients

**eTable 5.** 2x2 Tables for Comparing Nurse Predictions to Outcomes for All Predictions

|                   |                                             |                    |                   |       |
|-------------------|---------------------------------------------|--------------------|-------------------|-------|
| Nurse predictions | Hospital mortality                          |                    |                   | Total |
|                   |                                             | Died in hospital   | Survived hospital |       |
|                   | Death                                       | 32                 | 22                | 54    |
|                   | Survival                                    | 39                 | 208               | 247   |
|                   |                                             | 71                 | 230               | 301   |
| Nurse predictions | 6 month mortality                           |                    |                   |       |
|                   |                                             | Died by 6 months   | Alive at 6 months |       |
|                   | Death                                       | 65                 | 20                | 85    |
|                   | Survival                                    | 64                 | 148               | 212   |
|                   |                                             | 129                | 168               | 297   |
| Nurse predictions | Inability to return home at 6 months        |                    |                   |       |
|                   |                                             | Not home           | Home              |       |
|                   | Not home                                    | 103                | 44                | 147   |
|                   | Home                                        | 54                 | 94                | 148   |
|                   |                                             | 157                | 138               | 295   |
| Nurse predictions | Inability to toilet at 6 months             |                    |                   |       |
|                   |                                             | Not toileting      | Toileting         |       |
|                   | Not toileting                               | 19                 | 33                | 52    |
|                   | Toileting                                   | 11                 | 103               | 114   |
|                   |                                             | 30                 | 136               | 166   |
| Nurse predictions | Inability to ambulate 10 stairs at 6 months |                    |                   |       |
|                   |                                             | Not ambulating     | Ambulating        |       |
|                   | Not ambulating                              | 32                 | 39                | 71    |
|                   | Ambulating                                  | 15                 | 78                | 93    |
|                   |                                             | 47                 | 117               | 164   |
| Nurse predictions | Abnormal cognition at 6 months              |                    |                   |       |
|                   |                                             | Abnormal cognition | Normal cognition  |       |
|                   | Abnormal cognition                          | 18                 | 20                | 38    |
|                   | Normal cognition                            | 44                 | 83                | 127   |
|                   |                                             | 62                 | 103               | 165   |

n=number of patients

**eTable 6.** Operating Characteristics of Nurses for All Predictions<sup>a</sup>

|                                                                        | Prevalence <sup>b</sup><br>(No.; %<br>(95% CI)) | Sensitivity <sup>b</sup> | Specificity <sup>b</sup> | Likelihood<br>ratio positive <sup>c</sup> | Likelihood<br>ratio negative <sup>c</sup> | Diagnostic<br>odds ratio <sup>c</sup> | Positive<br>predictive<br>value <sup>b</sup> | Negative<br>predictive<br>value <sup>b</sup> |
|------------------------------------------------------------------------|-------------------------------------------------|--------------------------|--------------------------|-------------------------------------------|-------------------------------------------|---------------------------------------|----------------------------------------------|----------------------------------------------|
| Hospital<br>mortality<br>(n=301)                                       | n=71<br>23.6<br>(18.9-28.8)                     | 45.1<br>(33.2-57.3)      | 90.4<br>(85.9- 93.9)     | 4.71<br>(2.94-7.56)                       | 0.61<br>(0.49-0.75)                       | 7.76<br>(4.10-14.70)                  | 59.3<br>(45-72.4)                            | 84.2<br>(79.1-88.5)                          |
| 6 month<br>mortality<br>(n=297)                                        | n=129<br>43.4<br>(37.7-49.3)                    | 50.4<br>(41.5-59.3)      | 88.1<br>(82.2-92.6)      | 4.23<br>(2.71-6.61)                       | 0.56<br>(0.47- 0.68)                      | 7.52<br>(4.22-13.38)                  | 76.5<br>(66.0-85.0)                          | 69.9<br>(63.1-75.9)                          |
| Inability to return<br>to original<br>residence at 6<br>months (n=295) | n=157<br>53.2<br>(47.3-59.0)                    | 65.6<br>(57.6-73.0)      | 68.1<br>(59.6-75.8)      | 2.06<br>(1.57-2.69)                       | 0.51<br>(0.40-0.65)                       | 4.07<br>(2.51-6.62)                   | 70.1<br>(62.0-77.3)                          | 63.5<br>(55.2-71.3)                          |
| Unable to toilet<br>independently at<br>6 months<br>(n=166)            | n=30<br>18.1<br>(12.5-24.8)                     | 63.3<br>(43.9-80.1)      | 75.7<br>(67.6-82.7)      | 2.61<br>(1.74-3.90)                       | 0.48<br>(0.30-0.78)                       | 5.39<br>(2.36-12.30)                  | 36.5<br>(23.6-51.0)                          | 90.4<br>(83.4-95.1)                          |
| Unable to<br>ambulate 10<br>stairs at 6<br>months (n=164)              | n=47<br>28.7<br>(21.9-36.2)                     | 68.1<br>(52.9-80.9)      | 66.7<br>(57.4-75.1)      | 2.04<br>(1.48-2.82)                       | 0.48<br>(0.31-0.74)                       | 4.27<br>(2.08-8.74)                   | 45.1<br>(33.2-57.3)                          | 83.9<br>(74.8-90.7)                          |
| Abnormal<br>cognition at 6<br>months (n=165)                           | n=62<br>37.6<br>(30.2- 45.4)                    | 29.0<br>(18.2-41.9)      | 80.6<br>(71.6-87.7)      | 1.50<br>(0.86- 2.60)                      | 0.88<br>(0.73-1.06)                       | 1.70<br>(0.82-3.51)                   | 47.4<br>(31.0-64.2)                          | 65.4<br>(56.4-73.6)                          |

<sup>a</sup>( ) represents 95% confidence intervals

<sup>b</sup> presented as percentage

<sup>c</sup> presented as a ratio

n=number of patients

**eTable 7.** Agreement Between Physicians and Nurses Evaluating the Same Patient

| Variable                                                               | % agreement | Kappa (95% CI)   | McNemar's Test (p value) |
|------------------------------------------------------------------------|-------------|------------------|--------------------------|
| Hospital mortality (n=296)                                             | 86          | 0.49 (0.36-62)   | 0.45                     |
| 6 month mortality (n=298)                                              | 79          | 0.51 (0.41-0.62) | 0.13                     |
| Inability to return to original place of residence at 6 months (n=294) | 69          | 0.38 (0.28-0.49) | 0.002 <sup>a</sup>       |
| Unable to ambulate 10 stairs independently at 6 month (n=295)          | 73          | 0.46 (0.36-0.56) | 0.06                     |
| Inability to toilet independently at 6 months (n=300)                  | 71          | 0.41 (0.31-51)   | <0.001 <sup>a</sup>      |
| Abnormal cognition at 6 months (n=297)                                 | 69          | 0.32 (0.21-0.43) | 0.08                     |

<sup>a</sup>For McNemar's, for discordant pairs, both predictions were in the direction that nurses had more estimates of bad outcomes, physicians had more estimates of good outcomes

**eTable 8.** 2x2 Tables of Physician and Nurse Predictions of Outcomes

|                                             |                    | Nurse predictions  |                  | Total |
|---------------------------------------------|--------------------|--------------------|------------------|-------|
|                                             |                    | Hospital mortality |                  |       |
| Physician predictions                       |                    | Predict death      | Predict survival |       |
|                                             | Death              | 29                 | 19               | 48    |
|                                             | Survival           | 24                 | 224              | 248   |
|                                             |                    | 53                 | 243              | 296   |
| 6 month mortality                           |                    |                    |                  |       |
| Physician predictions                       |                    | Predict death      | Predict survival |       |
|                                             | Death              | 61                 | 37               | 98    |
|                                             | Survival           | 25                 | 175              | 200   |
|                                             |                    | 86                 | 212              | 298   |
| Inability to return home at 6 months        |                    |                    |                  |       |
| Physician predictions                       |                    | Not home           | Home             |       |
|                                             | Not home           | 87                 | 31               | 118   |
|                                             | Home               | 60                 | 116              | 176   |
|                                             |                    | 147                | 147              | 294   |
| Inability to toilet at 6 months             |                    |                    |                  |       |
| Physician predictions                       |                    | Not toileting      | Toileting        |       |
|                                             | Not toileting      | 75                 | 25               | 100   |
|                                             | Toileting          | 61                 | 139              | 200   |
|                                             |                    | 136                | 164              | 300   |
| Inability to ambulate 10 stairs at 6 months |                    |                    |                  |       |
| Physician predictions                       |                    | Not ambulating     | Ambulating       |       |
|                                             | Not ambulating     | 126                | 31               | 157   |
|                                             | Ambulating         | 48                 | 90               | 138   |
|                                             |                    | 174                | 121              | 295   |
| Abnormal cognition at 6 months              |                    |                    |                  |       |
| Physician predictions                       |                    | Abnormal cognition | Normal cognition |       |
|                                             | Abnormal cognition | 58                 | 55               | 113   |
|                                             | Normal cognition   | 38                 | 146              | 184   |
|                                             |                    | 96                 | 201              | 297   |

n=number of patients

**eTable 9.** 2x2 Tables for Comparing Physician Predictions to Outcomes for Confident Predictions<sup>a</sup>

|                       |                                             |                    |                   |       |
|-----------------------|---------------------------------------------|--------------------|-------------------|-------|
| Physician predictions | Hospital mortality                          |                    |                   | Total |
|                       |                                             | Died in hospital   | Survived hospital |       |
|                       | Death                                       | 8                  | 8                 | 16    |
|                       | Survival                                    | 11                 | 131               | 142   |
|                       |                                             | 19                 | 139               | 158   |
| Physician predictions | 6 month mortality                           |                    |                   | Total |
|                       |                                             | Died by 6 months   | Alive at 6 months |       |
|                       | Death                                       | 33                 | 2                 | 35    |
|                       | Survival                                    | 7                  | 78                | 85    |
|                       |                                             | 40                 | 80                | 120   |
| Physician predictions | Inability to return home at 6 months        |                    |                   | Total |
|                       |                                             | Not home           | Home              |       |
|                       | Not home                                    | 48                 | 8                 | 56    |
|                       | Home                                        | 15                 | 51                | 66    |
|                       |                                             | 63                 | 59                | 122   |
| Physician predictions | Inability to toilet at 6 months             |                    |                   | Total |
|                       |                                             | Not toileting      | Toileting         |       |
|                       | Not toileting                               | 12                 | 2                 | 14    |
|                       | Toileting                                   | 5                  | 63                | 68    |
|                       |                                             | 17                 | 65                | 82    |
| Physician predictions | Inability to ambulate 10 stairs at 6 months |                    |                   | Total |
|                       |                                             | Not ambulating     | Ambulating        |       |
|                       | Not ambulating                              | 18                 | 9                 | 27    |
|                       | Ambulating                                  | 7                  | 38                | 45    |
|                       |                                             | 25                 | 47                | 72    |
| Physician predictions | Abnormal cognition at 6 months              |                    |                   | Total |
|                       |                                             | Abnormal cognition | Normal cognition  |       |
|                       | Abnormal cognition                          | 10                 | 4                 | 14    |
|                       | Normal cognition                            | 22                 | 54                | 76    |
|                       |                                             | 32                 | 58                | 90    |

<sup>a</sup>confident predictions are defined as 4 (“considerably confident”) or 5 (“very confident”) on the Likert scale

n=number of patients

**eFigure 2.** Likelihood Ratios for Physicians and Nurses, Total Population and Confident Predictions<sup>a</sup>

Panel A. Positive Likelihood Ratios<sup>b, c</sup>

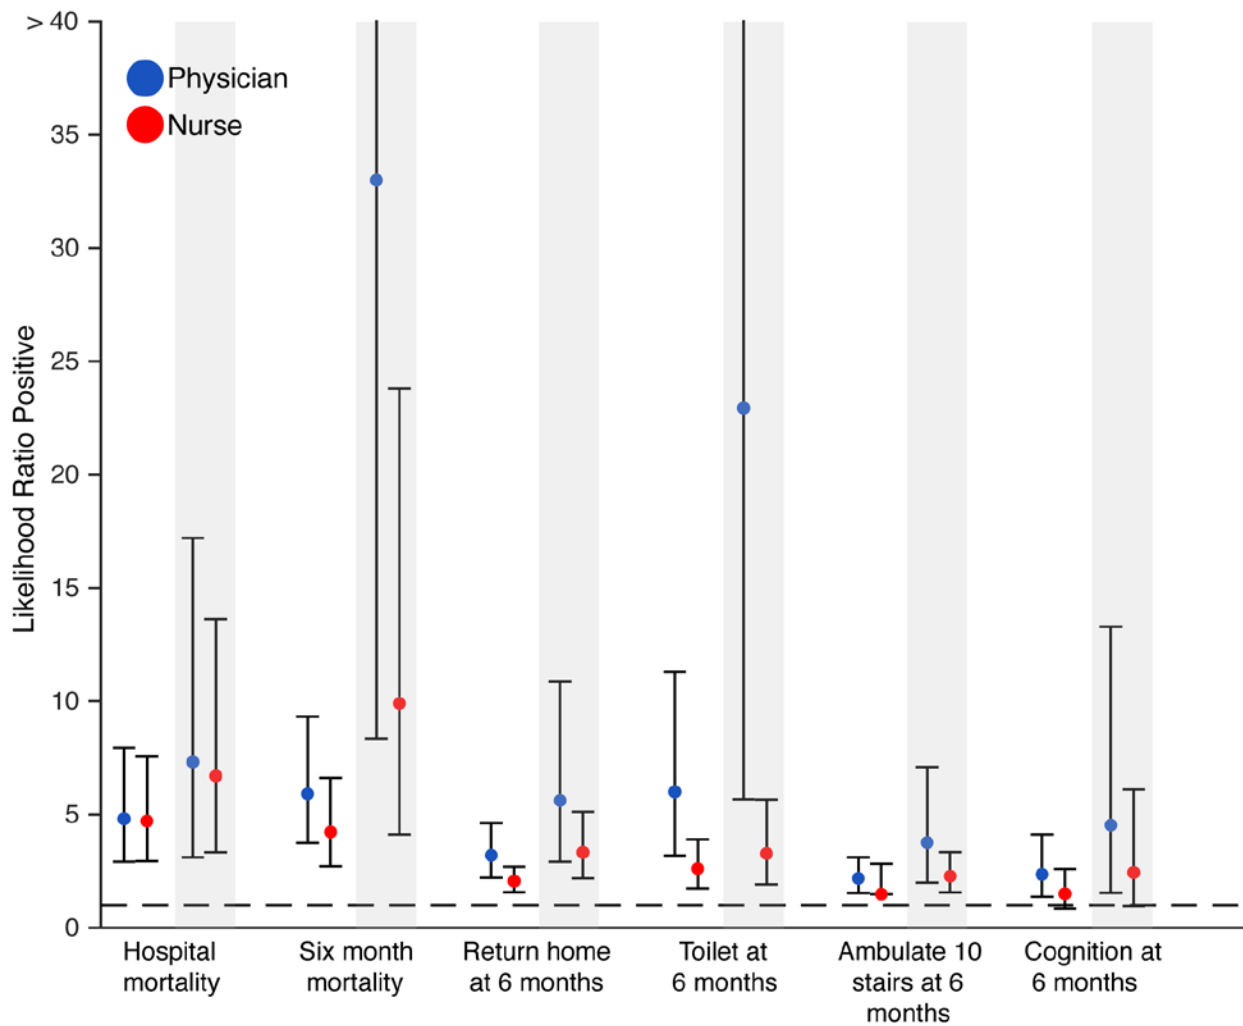

For positive likelihood ratios, the higher the likelihood ratio is, the more accurate the prediction is for an adverse outcome. The white bars represent “all predictions” and the grey bars are restricted to “confident predictions.”

<sup>a</sup>confident predictions are defined as 4 (“considerably confident”) or 5 (“very confident”) on the Likert scale

<sup>b</sup>For 6 month survival, the upper 95% CI for confident predictions of physicians reaches 130.63.

<sup>c</sup>For toilet, the upper 95% CI for confident predictions of physicians reaches 92.89

Error bars represent 95% confidence intervals

Panel B. Negative likelihood ratios

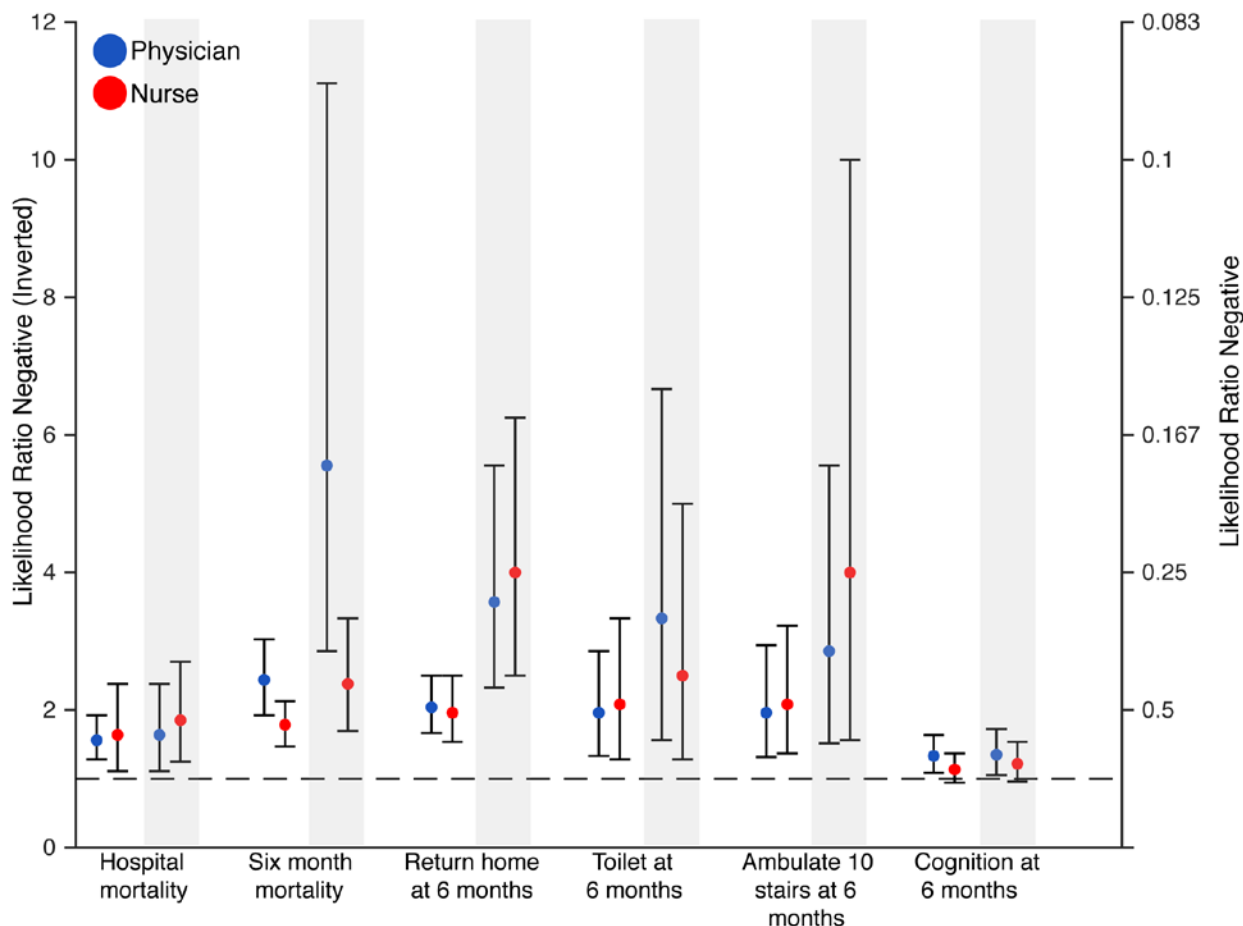

For negative likelihood ratios, the smaller the likelihood ratio is, the more accurate the prediction is for a favorable outcome. The white bars represent “all predictions” and the grey bars are restricted to “confident predictions.”

For physician predictions of a) total population and b) confident predictions, the number of patients were;

- Hospital mortality (total n=298, confident n=158)
- 6 month mortality (total n=296, confident n=120)
- Return to original place of residence at 6 months (total n=294 confident n=122)
- Toileting at 6 months total (n=165, confident n=82)
- Ambulating 10 stairs at 6 months (total n=163, confident n=72)
- Cognition total (n=164, confident n=113)

For nurse predictions of a) total population and b) confident predictions, the number of patients were;

- Hospital mortality total (n=301, confident n=160)
- 6 month mortality total (n=297, confident n=135)
- Return to original place of residence at 6 months total (n=295, confident n=154)
- Toileting at 6 months total (n=166, confident n=91)
- Ambulating 10 stairs at 6 months total (n=164, confident n=82)
- Cognition total (n=165, confident n=116)

Error bars represent 95% confidence intervals



**eTable 10.** Operating Characteristics by Physicians When Restricted to Confident Predictions<sup>a, b</sup>

|                                                                        | Prevalence <sup>c</sup><br>(No.; %<br>(95% CI)) | Sensitivity <sup>c</sup> | Specificity <sup>c</sup> | Likelihood<br>ratio positive <sup>d</sup> | Likelihood<br>ratio negative <sup>d</sup> | Diagnostic<br>odds ratio <sup>c</sup> | Positive<br>predictive<br>value <sup>c</sup> | Negative<br>predictive<br>value <sup>c</sup> |
|------------------------------------------------------------------------|-------------------------------------------------|--------------------------|--------------------------|-------------------------------------------|-------------------------------------------|---------------------------------------|----------------------------------------------|----------------------------------------------|
| Hospital mortality (n=158)                                             | n=19<br>12.0<br>(7.4-18.1)                      | 42.1<br>(20.3-66.5)      | 94.2<br>(89.0-97.5)      | 7.32 (3.11-17.20)                         | 0.61<br>(0.42-0.90)                       | 11.91<br>(3.86-37.01)                 | 50.0<br>(24.7-75.3)                          | 92.3<br>(86.6-96.1)                          |
| 6 month mortality (n=120)                                              | n=40<br>33.3<br>(25.0-42.5)                     | 82.5<br>(67.2- 92.7)     | 97.5<br>(91.3-99.7)      | 33.00<br>(8.34-130.63)                    | 0.18<br>(0.09-0.35)                       | 183.86<br>(39.00-∞)                   | 94.3<br>(80.8-99.3)                          | 91.8<br>(83.8-96.6)                          |
| Inability to return to original place of residence at 6 months (n=122) | n=63<br>51.6<br>(42.4-60.8)                     | 76.2<br>(63.8-86.0)      | 86.4<br>(75.0-94.0)      | 5.62<br>(2.91-10.86)                      | 0.28<br>(0.18-0.43)                       | 20.40<br>(8.02-51.76)                 | 85.7<br>(73.8-93.6)                          | 77.3<br>(65.3- 86.7)                         |
| Unable to toilet independently at 6 months (n=82)                      | n=17<br>20.7<br>(12.6-31.1)                     | 70.6<br>(44.0-89.7)      | 96.9<br>(89.3-99.6)      | 22.94<br>(5.67-92.89)                     | 0.30<br>(0.15-0.64)                       | 75.60<br>(14.14-389.34)               | 85.7<br>(57.2-98.2)                          | 92.6<br>(83.7-97.6)                          |
| Unable to ambulate 10 stairs at 6 months (n=72)                        | n=25<br>34.7<br>(23.9-46.9)                     | 72.0<br>(50.6-87.9)      | 80.9<br>(66.7-90.9)      | 3.76<br>(1.99-7.10)                       | 0.35<br>(0.18-0.66)                       | 10.86<br>(3.54-33.26)                 | 66.7<br>(46.0-83.5)                          | 84.4<br>(70.5-93.5)                          |
| Abnormal cognition at 6 months (n=90)                                  | n=32<br>38.9<br>(29.9-48.6)                     | 31.3<br>(16.1-50.0)      | 93.1 (83.3-98.1)         | 4.53<br>(1.54-13.29)                      | 0.74<br>(0.58-0.95)                       | 6.14<br>(1.82-20.49)                  | 71.4(59.5-80.9)                              | 71.1 (59.5-80.9)                             |

<sup>a</sup>confident predictions are defined as 4 (“considerably confident”) or 5 (“very confident”) on the Likert scale

<sup>b</sup>( ) represents 95% confidence intervals

<sup>c</sup> presented as percentage

<sup>d</sup> presented as a ratio

n=number of patients

**eTable 11.** 2x2 Tables for Comparing Nurses Predictions to Outcomes for Confident Predictions<sup>a</sup>

|                   |                                             |                    |                   |     |
|-------------------|---------------------------------------------|--------------------|-------------------|-----|
| Nurse predictions | Hospital mortality                          |                    | Total             |     |
|                   |                                             | Died in hospital   | Survived hospital |     |
|                   | Death                                       | 13                 | 10                | 23  |
|                   | Survival                                    | 13                 | 124               | 134 |
|                   |                                             | 26                 | 134               | 160 |
| Nurse predictions | 6 month mortality                           |                    |                   |     |
|                   |                                             | Died by 6 months   | Alive at 6 months |     |
|                   | Death                                       | 32                 | 5                 | 37  |
|                   | Survival                                    | 21                 | 77                | 98  |
|                   |                                             | 53                 | 82                | 135 |
| Nurse predictions | Inability to return home at 6 months        |                    |                   |     |
|                   |                                             | Not home           | Home              |     |
|                   | Not home                                    | 68                 | 17                | 85  |
|                   | Home                                        | 16                 | 53                | 69  |
|                   |                                             | 84                 | 70                | 154 |
| Nurse predictions | Inability to toilet at 6 months             |                    |                   |     |
|                   |                                             | Not toileting      | Toileting         |     |
|                   | Not toileting                               | 13                 | 15                | 28  |
|                   | Toileting                                   | 6                  | 57                | 63  |
|                   |                                             | 19                 | 72                | 91  |
| Nurse predictions | Inability to ambulate 10 stairs at 6 months |                    |                   |     |
|                   |                                             | Not ambulating     | Ambulating        |     |
|                   | Not ambulating                              | 21                 | 21                | 42  |
|                   | Ambulating                                  | 4                  | 36                | 40  |
|                   |                                             | 25                 | 57                | 82  |
| Nurse predictions | Abnormal cognition at 6 months              |                    |                   |     |
|                   |                                             | Abnormal cognition | Normal cognition  |     |
|                   | Abnormal cognition                          | 8                  | 7                 | 15  |
|                   | Normal cognition                            | 22                 | 57                | 79  |
|                   |                                             | 30                 | 64                | 94  |

<sup>a</sup>confident predictions are defined as 4 (“considerably confident”) or 5 (“very confident”) on the Likert scale

n=number of patients

**eTable 12.** Operating Characteristics of Nurses When Restricted to Confident Predictions<sup>a, b</sup>

|                                                               | Prevalence <sup>c</sup><br>(No.; %<br>(95% CI)) | Sensitivity <sup>c</sup> | Specificity <sup>c</sup> | Likelihood<br>ratio positive <sup>d</sup> | Likelihood<br>ratio negative <sup>d</sup> | Diagnostic<br>odds ratio <sup>d</sup> | Positive<br>predictive<br>value <sup>c</sup> | Negative<br>predictive<br>value <sup>c</sup> |
|---------------------------------------------------------------|-------------------------------------------------|--------------------------|--------------------------|-------------------------------------------|-------------------------------------------|---------------------------------------|----------------------------------------------|----------------------------------------------|
| Hospital mortality (n=160)                                    | n=26<br>16.3<br>(10.9-22.9)                     | 50.0<br>(29.9-70.1)      | 92.5<br>(86.7- 96.4)     | 6.70<br>(3.30-13.62)                      | 0.54<br>(0.37-0.80)                       | 12.40<br>(4.62-33.35)                 | 56.5<br>(34.5-76.8)                          | 90.5<br>(84.3-94.9)                          |
| 6 month mortality (n=135)                                     | n=53<br>38.8<br>(30.5-47.6)                     | 60.4<br>(46.0-73.5)      | 93.9<br>(86.3-98.0)      | 9.90<br>(4.12-23.80)                      | 0.42<br>(0.30- 0.59)                      | 23.47<br>(8.34-65.48)                 | 86.5<br>(71.2-95.5)                          | 78.6<br>(69.1-86.2)                          |
| Inability to return to original residence at 6 months (n=154) | n=84<br>54.5<br>(46.3-62.6)                     | 81.0<br>(70.9-88.7)      | 75.7<br>(64.0-85.2)      | 3.33<br>(2.18-5.11)                       | 0.25<br>(0.16-0.40)                       | 13.25<br>(6.16-28.52)                 | 80.0<br>(69.9-87.9)                          | 76.8<br>(65.1-86.1)                          |
| Unable to toilet independently at 6 months (n=91)             | n=19<br>20.9<br>(13.1-30.7)                     | 68.4<br>(43.4-87.4)      | 79.2<br>(68.0-87.8)      | 3.28<br>(1.91-5.66)                       | 0.40<br>(0.20-0.78)                       | 8.23<br>(2.74-24.61)                  | 46.4<br>(27.5-66.1)                          | 90.5<br>(80.4-96.4)                          |
| Unable to ambulate 10 stairs at 6 months (n=82)               | n=25<br>30.5<br>(20.8-41.6)                     | 84.0<br>(63.9-95.5)      | 63.2<br>(49.3-75.6)      | 2.28<br>(1.56-3.34)                       | 0.25<br>(0.10-0.64)                       | 9.00<br>(2.81-28.39)                  | 50.0<br>(34.2-65.8)                          | 90.0<br>(76.3-97.2)                          |
| Abnormal cognition at 6 months (n=94)                         | n=30<br>31.9<br>(22.7- 42.3)                    | 26.7<br>(12.8-45.9)      | 89.1 (78.8-95.5)         | 2.44<br>(0.97- 6.10)                      | 0.82<br>(0.65-1.04)                       | 2.96<br>(0.99-8.86)                   | 53.3(26.6-78.7)                              | 72.2<br>(60.9-81.7)                          |

<sup>a</sup>confident predictions are defined as 4 (“considerably confident”) or 5 (“very confident”) on the Likert scale

<sup>b</sup>( ) represents 95% confidence intervals

<sup>c</sup> presented as percentage

<sup>d</sup> presented as a ratio

n=number of patients

**eFigure 3. Likelihood Ratios for Physicians and Nurses Concordant Predictions<sup>a</sup>**

Panel A. Positive likelihood ratios<sup>b</sup>

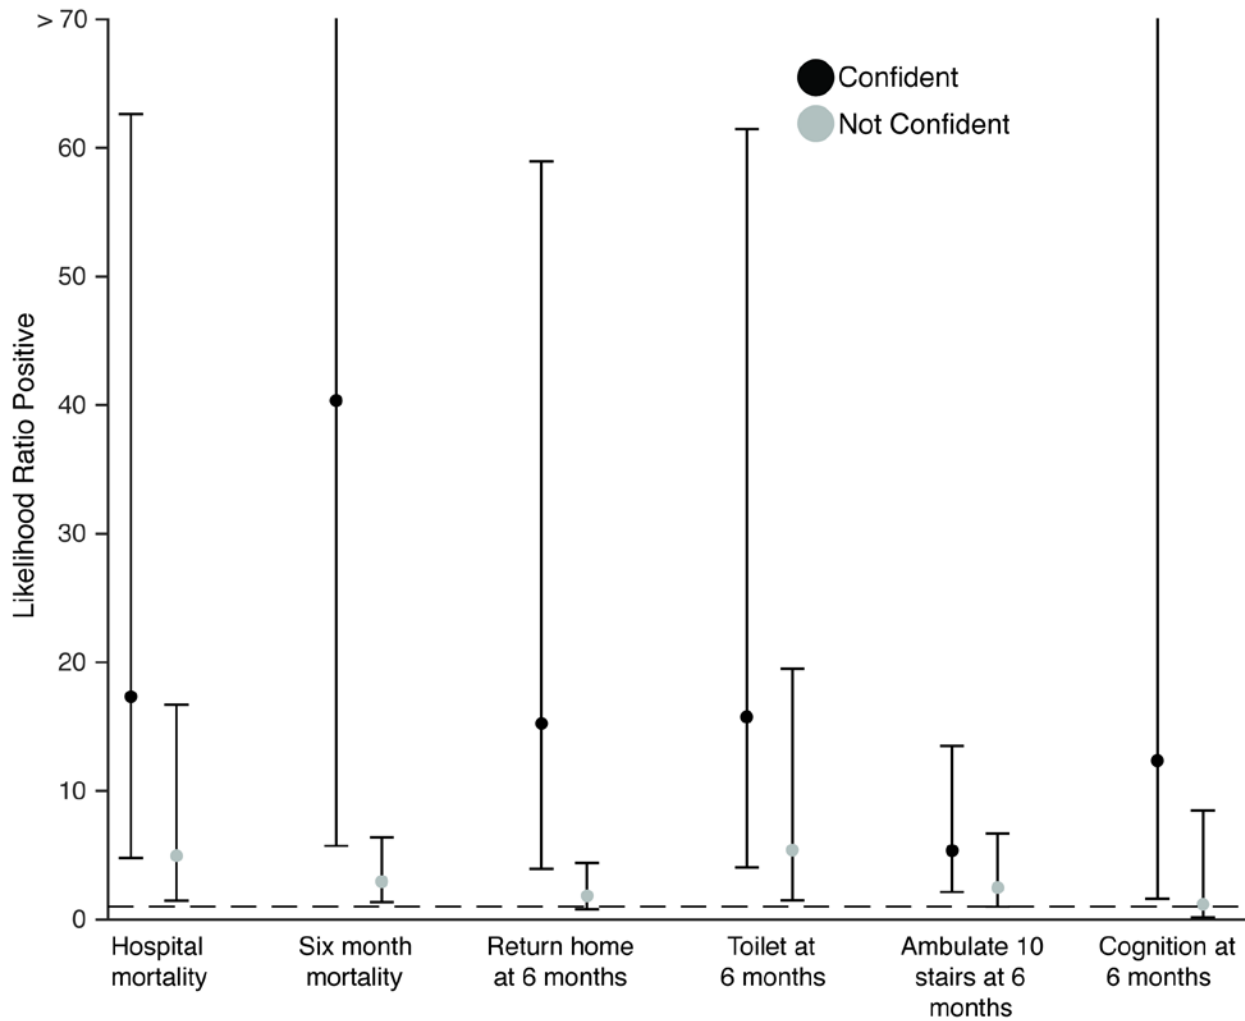

For positive likelihood ratios, the higher the likelihood ratio is, the more accurate the prediction is for an adverse outcome. The black points represent when the physicians and nurses were both confident predictions and the grey points represent when physicians and nurses were both not confident.

<sup>a</sup>confident predictions are defined as 4 (“considerably confident”) or 5 (“very confident”) on the Likert scale

<sup>b</sup>For 6 month survival, the upper 95% CI for confident predictions of physicians reaches 284.28.

Error bars represent 95% confidence intervals

Panel B. Negative likelihood ratios

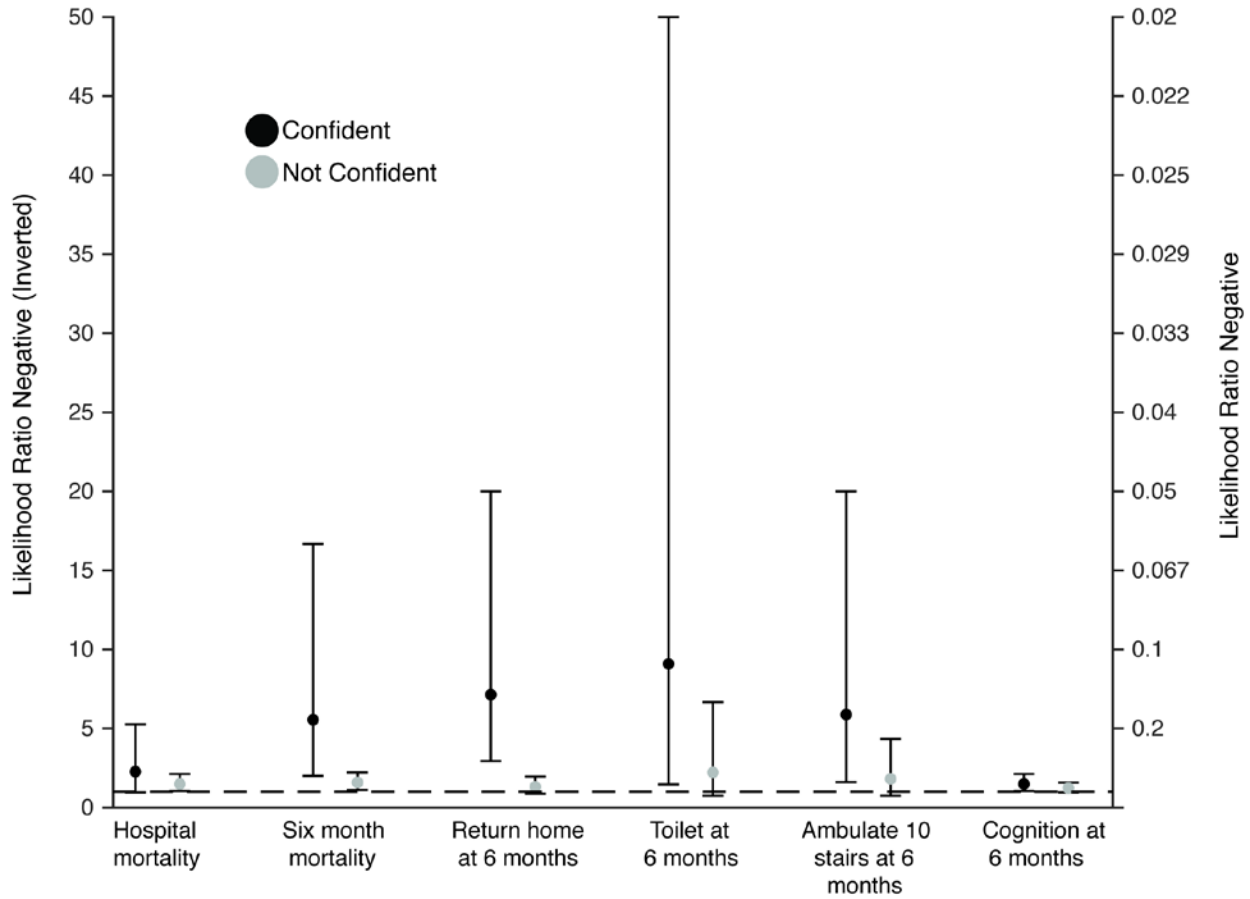

For negative likelihood ratios, the smaller the likelihood ratio is, the more accurate the prediction is for a favorable outcome. The black points represent when the physicians and nurses were both confident predictions and the grey points represent when physicians and nurses were both not confident.

For concordant predictions that are a) confident and b) not confident predictions, the sample sizes were  
 Hospital mortality (confident n=98, not confident n=60)  
 6-month mortality (confident n=66, not confident n =76)  
 Return to original place of residence at 6 months (confident n=66 not confident=49)  
 Toileting at 6 months (confident n=45, not confident n =32)  
 Ambulating 10 stairs at 6 months (confident n=39, not confident n =34)  
 Cognition (confident n=65, not confident n =10)

Error bars represent 95% confidence intervals

**eTable 13.** Operating Characteristics of Concordant Responses and at Both Providers Being Confident at Predicting Mortality and 6 Month Physical and Cognitive Function<sup>a, b</sup>

|                                                            | Prevalence <sup>c</sup><br>(No; % (95% CI)) | Sensitivity <sup>c</sup> | Specificity <sup>c</sup> | Likelihood ratio positive <sup>d</sup> | Likelihood ratio negative <sup>d</sup> | Diagnostic odds ratio <sup>d</sup> | Positive predictive value <sup>c</sup> | Negative predictive value <sup>c</sup> |
|------------------------------------------------------------|---------------------------------------------|--------------------------|--------------------------|----------------------------------------|----------------------------------------|------------------------------------|----------------------------------------|----------------------------------------|
| Hospital mortality (n=98)                                  | n=7<br>7.1<br>(2.9-14.2)                    | 57.1<br>(18.4-90.1)      | 96.7<br>(90.7- 99.3)     | 17.33<br>(4.80-62.62)                  | 0.44<br>(0.19-1.04)                    | 39.11<br>(6.61-240.04)             | 57.1<br>(18.4-90.1)                    | 96.7<br>(90.7-99.3)                    |
| 6 month mortality (n=66)                                   | n=17<br>25.76<br>(15.8-38.0)                | 82.4<br>(56.6-96.2)      | 98.0<br>(89.1-99.9)      | 40.35<br>(5.73-284.28)                 | 0.18 (0.06-0.50)                       | 224.00<br>(25.6-∞)                 | 93.3<br>(68.1-99.8)                    | 94.1<br>(83.8-98.8)                    |
| Inability to return to original residence at months (n=66) | n=31<br>47.0<br>(34.6-59.7)                 | 87.1<br>(70.2-96.4)      | 94.3<br>(80.8-99.3)      | 15.24<br>(3.94-58.94)                  | 0.14<br>(0.05-0.34)                    | 111.38<br>(20.23-591.09)           | 93.1<br>(77.2-99.2)                    | 89.2<br>(74.6-97.0)                    |
| Unable to toilet at 6 months (n=45)                        | n=10<br>22.2<br>(11.2-37.1)                 | 90.0<br>(55.5-99.7)      | 94.3<br>(80.8-99.3)      | 15.75<br>(4.04-61.46)                  | 0.11<br>(0.02-0.68)                    | 148.50<br>(14.31-∞)                | 81.8<br>(48.2-97.7)                    | 97.1<br>(84.7-99.9)                    |
| Unable to ambulate 10 stairs at 6 months (n=39)            | n=14<br>35.9<br>(21.2-52.8)                 | 85.7<br>(57.2-98.2)      | 84.0<br>(63.9-95.5)      | 5.36<br>(2.13-13.49)                   | 0.17<br>(0.05-0.62)                    | 31.50<br>(5.38-178.01)             | 75.0<br>(47.6-92.7)                    | 91.3<br>(72.0-98.9)                    |
| Abnormal cognition <sup>§</sup> at 6 months (n=52)         | n=17<br>32.7<br>(20.3- 47.1)                | 35.3<br>(14.2-61.74)     | 97.1<br>(83.1-99.9)      | 12.35<br>(1.61-94.63)                  | 0.67<br>(0.47-0.95)                    | 18.55<br>(2.53-∞)                  | 85.7<br>(42.1-99.6)                    | 75.6<br>(60.5-87.1)                    |

<sup>a</sup>confident predictions are defined as 4 (“considerably confident”) or 5 (“very confident”) on the Likert scale

<sup>b</sup>( ) represents 95% confidence intervals

<sup>c</sup> presented as percentage

<sup>d</sup> presented as a ratio

n=number of patients

**eFigure 4.** Physician and Nurse Predictions of 6-Month Mortality by APACHE III Quartile<sup>a,b</sup>

Panel A. Positive likelihood ratio

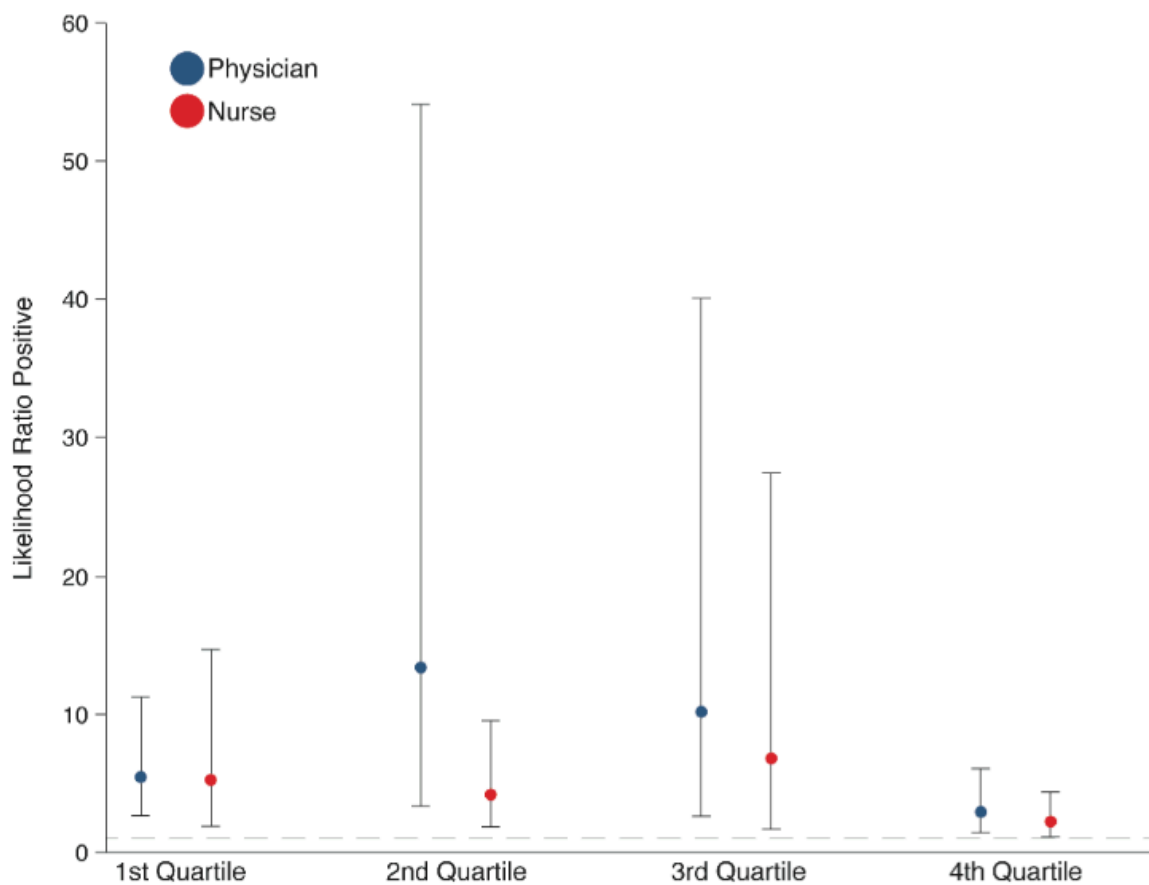

Panel B. Negative likelihood ratio

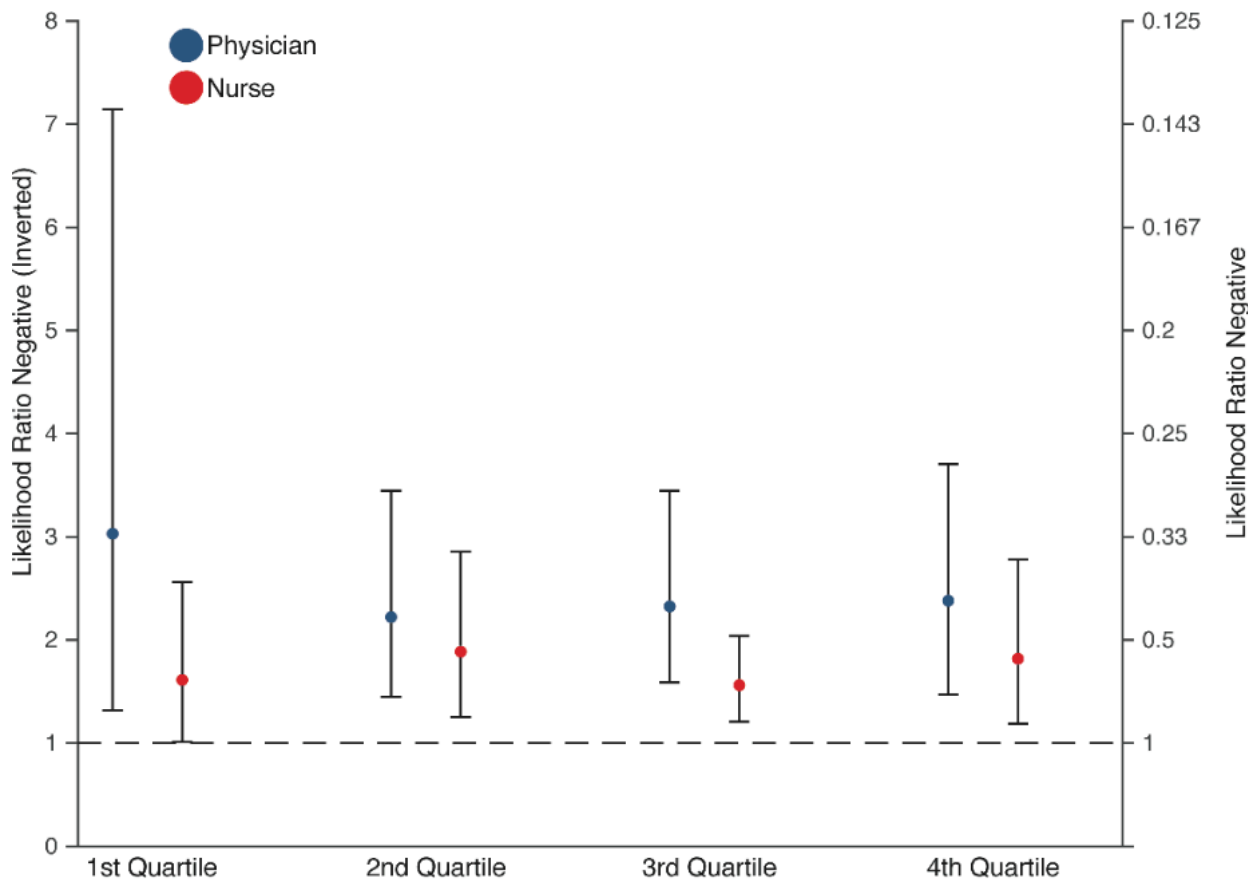

<sup>a</sup>The APACHE III mean quartiles are 1 (n=78, mean 59.1, median 63, range 18-75), 2 (n=76 mean 86.3, median 86.5, range 76-95), 3 (n=76, mean 109.0, median 110 range 97-120), 4 (n=73, mean 140.9, median 137, range 121-205)

<sup>b</sup>Error bars represent 95% confidence intervals



**eTable 14.** Prediction of Outcomes Based on Objective Measures, Physician, Nurse Predictions and Confidence

| Outcome <sup>a</sup>                                                   | Model number <sup>b</sup> | C statistic | 95% CI        | p-value compared to model 1 |
|------------------------------------------------------------------------|---------------------------|-------------|---------------|-----------------------------|
| Hospital mortality (n=294)                                             | 1                         | 0.789       | (0.728-0.850) |                             |
|                                                                        | 2                         | 0.850       | (0.801-0.898) | 0.007                       |
|                                                                        | 3                         | 0.837       | (0.783-0.890) | 0.02                        |
|                                                                        | 4                         | 0.865       | (0.818-0.911) | 0.002                       |
| 6 month mortality (n=291)                                              | 1                         | 0.803       | (0.751-0.855) |                             |
|                                                                        | 2                         | 0.870       | (0.829-0.912) | <0.001                      |
|                                                                        | 3                         | 0.829       | (0.782-0.877) | 0.06                        |
|                                                                        | 4                         | 0.875       | (0.834-0.916) | <0.001                      |
| Inability to return to original place of residence at 6 months (n=285) | 1                         | 0.800       | (0.749-0.851) |                             |
|                                                                        | 2                         | 0.844       | (0.798-0.889) | 0.009                       |
|                                                                        | 3                         | 0.819       | (0.771-0.867) | 0.11                        |
|                                                                        | 4                         | 0.848       | (0.804-0.893) | 0.005                       |
| Unable to toilet independently at 6 months (n=161)                     | 1                         | 0.769       | (0.685-0.853) |                             |
|                                                                        | 2                         | 0.846       | (0.759-0.932) | 0.03                        |
|                                                                        | 3                         | 0.818       | (0.732-0.903) | 0.16                        |
|                                                                        | 4                         | 0.849       | (0.759-0.938) | 0.06                        |
| Unable to ambulate 10 stairs at 6 months (n=160)                       | 1                         | 0.721       | (0.635-0.807) |                             |
|                                                                        | 2                         | 0.774       | (0.690-0.859) | 0.10                        |
|                                                                        | 3                         | 0.769       | (0.681-0.857) | 0.10                        |
|                                                                        | 4                         | 0.784       | (0.698-0.870) | 0.06                        |
| Abnormal cognition at 6 months (n=164)                                 | 1                         | 0.654       | (0.565-0.743) |                             |
|                                                                        | 2                         | 0.669       | (0.580-0.758) | 0.52                        |
|                                                                        | 3                         | 0.657       | (0.568-0.746) | 0.76                        |
|                                                                        | 4                         | 0.669       | (0.581-0.758) | 0.52                        |

<sup>a</sup>For each outcome only patients who had all available data for that outcome and the below covariates used in models 1-4 were included. For hospital survival, 6—month survival, and return to home 299 patients were eligible. The outcomes of toileting, ambulating 10 stairs and cognition were only examined among survivors (n=169). Differences between these numbers and those in column 1 represent missing data.

<sup>b</sup>Model 1 includes age, APACHE III score, functional comorbidity index and indicator variables for sex, ICU patient type (medical versus surgical admission), and hospitalization in the prior year. Model 2 includes all variables in model 1 plus physicians' prediction and confidence. Confidence is on a 1 to 5 scale; 1 is "not confident at all", 2 is "slightly confident", 3 is "moderately confident", 4 is "considerably confident" and 5 is "very confident" Model 3 includes all variables in model 1 plus nurses' prediction and confidence. Model 4 includes all variables in model 1 plus both physician and nurses' prediction and confidence.

n=total number of patients included in each model
